# Supplementary material for: Association Mapping and Development of Marker-Assisted Selection Tools for the Resistance to White Pine Blister Rust in the Alberta Limber Pine Populations
Source: Front Plant Sci. 2020 Sep 15;11:557672. doi: 10.3389/fpls.2020.557672 (PMC7522202; doi:10.3389/fpls.2020.557672)
Supplement: Supplementary file 4 [file Table_1.xlsx]

## Sheet: TabS1
Table S1: Background information and resistance assessment of Alberta seed families
Family	Sow #	Seedling (n)	Needle spots	Clean stem (%)	Stem symptom (%)	Phenotypeic segregation ratio (expected) (*)	P (X2 test) (*)	Latitute	Longtitude	Elevation (m)	Canker of Parental tree	Stand infection
6674	MGR-181	28	1	0	1	na	na	49.1906	-113.957	1658	Yes	0.95
6677	MGR-182	28	1	0	1	na	na	49.2019	-113.973	1510	Yes	0.83
7027	MGR-183	12	1	0.416667	0.583333	5:7 (1:1)	0.68	49.1989	-113.975	1514	No	0.83
6468	MGR-184	28	1	0	1	na	na	49.1344	-113.895	1563	Yes	0.87
6470	MGR-185	28	1	0.5	0.5	14:14 (1:1)	1	49.1322	-113.895	1575	No	0.87
6665	MGR-186	34	1	0.5	0.5	17:17 (1:1)	1	49.1372	-113.895	1549	No	0.95
6476	MGR-187	21	1	0.05	0.95	na	na	49.1511	-113.885	1651	No	Isolated tree
6669	MGR-188	28	1	0.0357143	0.964286	na	na	49.1447	-114.03	1908	No	Isolated tree
7026	MGR-189	29	1	0	1	na	na	49.1417	-114.031	1787	Yes	Isolated tree
Prairie Bluff (PB) # 2	MGR-191	135	0.99	0.7111	0.2889	90:45 (3:1)	0.13	49.3147	-114.1	1786	No	0.94
Note: (*) The observed phenotypic segregation fit an expected ratio at 1:1 for three families and at 3:1 for one family.

## Sheet: S2
Table S2: An updated limber pine LG8 map by integration of maps from exom-seq and Sequenom genotyping using MergeMap software.
LG08	POSITION
*M75325	0
*M66234	7.15
*M215911	7.35
*M101536	8.83
*M101543	8.83
*M101748	8.83
*M105568	8.83
*M109745	8.83
*M110060	8.83
*M117662	8.83
*M117946	8.83
*M126926	8.83
*M143599	8.83
*M147345	8.83
*M148789	8.83
*M149730	8.83
*M154018	8.83
*M158108	8.83
*M172110	8.83
*M177834	8.83
*M188831	8.83
*M190033	8.83
*M190562	8.83
*M195945	8.83
*M201075	8.83
*M221810	8.83
*M223097	8.83
*M225642	8.83
*M240547	8.83
*M246928	8.83
*M249874	8.83
*M253214	8.83
*M258993	8.83
*M265536	8.83
*M266140	8.83
*M269362	8.83
*M269393	8.83
*M269756	8.83
*M275292	8.83
*M285270	8.83
*M289781	8.83
*M294912	8.83
*M310849	8.83
*M317219	8.83
*M317888	8.83
*M319335	8.83
*M321389	8.83
*M333948	8.83
*M334452	8.83
*M34174	8.83
*M35134	8.83
*M351918	8.83
*M356803	8.83
*M360734	8.83
*M368438	8.83
*M371980	8.83
*M372917	8.83
*M384871	8.83
*M384881	8.83
*M384912	8.83
*M385994	8.83
*M393489	8.83
*M413498	8.83
*M417793	8.83
*M440995	8.83
*M462534	8.83
*M481366	8.83
*M50266	8.83
*M559784	8.83
*M59145	8.83
*M597168	8.83
*M667224	8.83
*M71773	8.83
*M73640	8.83
*M83195	8.83
*M86284	8.83
*M86882	8.83
*M90112	8.83
*M92214	8.83
*M236468	12.92
*M384667	12.92
*M107111	12.93
*M96335	12.94
*M368430	15.06
*M422636	15.06
*M107377	17.21
*M147041	17.21
*M229204	17.21
*M321365	17.21
*M469504	17.21
*M294617	18.23
*M537760	18.23
*M129394	18.33
*M130257	18.33
*M165983	18.33
*M187490	18.33
*M187937	18.33
*M202396	18.33
*M443446	18.33
*M491836	18.33
*M252730	20.59
*M546137	20.59
*M207728	21.13
*M362223	21.13
*M69496	21.13
*M114821	22.15
*M162847	22.15
*M348734	22.15
*M349459	22.15
*M141289	22.65
*M154641	22.65
*M327520	22.65
*M547581	22.65
*M72280	22.65
*M148813	23.18
*M171067	23.18
*M197158	23.18
*M205272	23.18
*M208704	23.18
*M263607	23.18
*M47829	23.18
*M168803	23.68
*M276924	23.68
*M357064	23.68
*M173161	34.58
*M176706	34.58
*M178396	34.58
*M183640	34.58
*M214509	34.58
*M225756	34.58
*M250162	34.58
*M251805	34.58
*M257075	34.58
*M272778	34.58
*M274483	34.58
*M282473	34.58
*M301513	34.58
*M324234	34.58
*M325172	34.58
*M328676	34.58
*M330175	34.58
*M342861	34.58
*M351585	34.58
*M356941	34.58
*M391207	34.58
*M391851	34.58
*M399519	34.58
*M416533	34.58
*M425469	34.58
*M515896	34.58
*M71683	34.58
*M91464	34.58
*M11312	36.35
*M140427	36.35
*M143741	36.35
*M183037	36.35
*M228186	36.35
*M337647	36.35
*M338585	36.35
*M343792	36.35
*M344727	36.35
*M417104	36.35
*M44887	36.35
*M494231	36.35
*M67766	36.35
*M74705	36.35
*M154861	37.04
*M160552	37.04
*M224030	37.04
*M275642	37.04
*M288323	37.04
*M328015	37.04
*M85889	37.04
*M101123	37.37
*M106698	37.37
*M124103	37.37
*M126287	37.37
*M142385	37.37
*M161122	37.37
*M167299	37.37
*M181545	37.37
*M224585	37.37
*M229296	37.37
*M230610	37.37
*M310324	37.37
*M364051	37.37
*M424959	37.37
*M459104	37.37
*M478350	37.37
*M499392	37.37
*M518304	37.37
*M527958	37.37
*M571506	37.37
*M60287	37.37
*M619909	37.37
*M665880	37.37
*M68311	37.37
*M201576	37.55
*M245187	37.55
*M199406	39.43
*M212095	39.43
*M269085	39.43
*M392189	39.43
*M407855	39.43
*M605882	39.43
*M232984	41.49
*M238371	43.56
*M446188	43.56
*M140848	44.67
*M172435	44.67
*M215685	44.67
*M248897	44.67
*M107850	45.78
*M112793	45.78
*M125537	45.78
*M136605	45.78
*M151553	45.78
*M182767	45.78
*M206416	45.78
*M428963	45.78
*M68628	45.78
*M69867	45.78
*M70555	45.78
*M105374	46.62
*M108357	46.62
*M148652	46.62
*M153005	46.62
*M228910	46.62
*M234695	46.62
*M235709	46.62
*M253838	46.62
*M253840	46.62
*M323857	46.62
*M412038	46.62
*M420602	46.62
*M465312	46.62
*M479747	46.62
*M596520	46.62
*M64061	46.62
*M320002	47.65
*M241829	48.68
*M371875	48.68
*M127669	49.7
*M248941	49.7
*M315151	49.7
*M429826	49.7
*M128625	50.01
*M143358	50.01
*M151234	50.01
*M171053	50.01
*M205444	50.01
*M250295	50.01
*M265733	50.01
*M322682	50.01
*M421820	50.01
*M451810	50.01
*M463560	50.01
*M482972	50.01
*M558420	50.01
*M331781	50.02
*M283051	50.88
*M323204	53.13
*M326348	53.13
*M401454	53.13
*M172708	53.14
*M204548	53.14
*M243430	53.14
*M284324	53.14
*M298597	53.14
*M309416	53.14
*M429938	53.14
*M451292	53.14
*M147377	54.25
*M201024	54.25
*M210173	54.25
*M274512	54.25
*M302326	54.25
*M515359	54.25
*M294788	55.27
*M211199	55.28
*M174353	58.4
*M113180	69.53
*M145091	69.53
*M145619	69.53
*M150717	69.53
*M163742	69.53
*M180203	69.53
*M191573	69.53
*M224116	69.53
*M224402	69.53
*M250203	69.53
*M250512	69.53
*M255608	69.53
*M303946	69.53
*M306991	69.53
*M388662	69.53
*M435298	69.53
*M545660	69.53
*M560682	69.53
*M93611	69.53
*M119763	70.55
*M122772	70.55
*M124352	70.55
*M130127	70.55
*M143705	70.55
*M167058	70.55
*M172810	70.55
*M173944	70.55
*M187452	70.55
*M197858	70.55
*M207388	70.55
*M218344	70.55
*M245820	70.55
*M24826	70.55
*M249341	70.55
*M255118	70.55
*M262837	70.55
*M266557	70.55
*M277413	70.55
*M320099	70.55
*M363856	70.55
*M37839	70.55
*M384111	70.55
*M399340	70.55
*M43784	70.55
*M447153	70.55
*M458089	70.55
*M50209	70.55
*M540872	70.55
*M562527	70.55
*M646187	70.55
*M696362	70.55
*M83745	70.55
*M28356	70.59
*M254265	71.67
*M371528	71.67
*M441029	71.67
*M56330	71.67
*M463244	72.16
*M60316	72.16
*M126734	72.65
*M313063	72.65
*M110415	73.76
*M140260	73.76
*M151943	73.76
*M160545	73.76
*M174593	73.76
*M177727	73.76
*M189190	73.76
*M191951	73.76
*M193626	73.76
*M283314	73.76
*M305707	73.76
*M308638	73.76
*M320826	73.76
*M33700	73.76
*M342879	73.76
*M345815	73.76
*M383716	73.76
*M403303	73.76
*M416102	73.76
*M458732	73.76
*M469370	73.76
*M55481	73.76
*M566962	73.76
*M59860	73.76
*M71496	73.76
*M72691	73.76
*M125106	74.88
*M131598	74.88
*M176165	74.88
*M257656	74.88
*M287075	74.88
*M34134	74.88
*M159152	75.99
*M180629	75.99
*M250928	75.99
*M358259	75.99
*M361841	75.99
*M122791	82.02
*M131485	82.02
*M142766	82.02
*M152978	82.02
*M173120	82.02
*M197047	82.02
*M261002	82.02
*M318374	82.02
*M382199	82.02
*M502883	82.02
*M68336	82.02
*M111680	83.08
*M146747	83.08
*M168118	83.08
*M177455	83.08
*M180756	83.08
*M239538	83.08
*M262866	83.08
*M309010	83.08
*M336602	83.08
*M420257	83.08
*M108926	83.57
*M128720	83.57
*M144080	83.57
*M147406	83.57
*M154313	83.57
*M178033	83.57
*M208862	83.57
*M226652	83.57
*M244718	83.57
*M270927	83.57
*M291891	83.57
*M422962	83.57
*M442926	83.57
*M447972	83.57
*M519592	83.57
*M115558	83.58
*M432084	83.58
*M85038	83.58
*M102231	84.6
*M103705	84.6
*M115771	84.6
*M116930	84.6
*M123123	84.6
*M133322	84.6
*M145522	84.6
*M146056	84.6
*M171879	84.6
*M172127	84.6
*M198304	84.6
*M208360	84.6
*M208596	84.6
*M209291	84.6
*M221496	84.6
*M236643	84.6
*M239234	84.6
*M266222	84.6
*M270169	84.6
*M273614	84.6
*M295971	84.6
*M35093	84.6
*M362986	84.6
*M383198	84.6
*M505238	84.6
*M55189	84.6
*M82755	84.6
*M89223	84.6
*M91283	84.6
*M101551	84.68
*M121658	84.68
*M122041	84.68
*M127508	84.68
*M134136	84.68
*M140665	84.68
*M141554	84.68
*M143475	84.68
*M195754	84.68
*M207176	84.68
*M215996	84.68
*M265080	84.68
*M270719	84.68
*M273143	84.68
*M281161	84.68
*M282282	84.68
*M34531	84.68
*M349741	84.68
*M35208	84.68
*M365091	84.68
*M43587	84.68
*M68903	84.68
*M71208	84.68
*M91690	84.68
*M91827	84.68
*M111991	85.11
*M145108	85.79
*M199600	85.79
*M230046	85.79
*M101155	86.13
*M166554	86.13
*M183379	86.13
*M191937	86.13
*M249729	86.13
*M158638	87.15
*M184517	87.15
*M219894	87.15
*M234352	87.15
*M165260	89.21
*M58338	89.21
*M622081	89.21
*M233519	89.4
*M305755	89.4
*M379378	89.4
*M182410	90.24
*M184200	90.24
*M249769	90.24
*M305883	90.24
*M171081	91.46
*M321697	91.46
*M442744	91.46
*M115808	92.49
*M160717	93.51
*M168871	93.51
*M172613	93.51
*M194036	93.51
*M117078	94.53
*M167398	94.53
*M280954	94.53
*M297495	94.53
*M307195	94.53
*M425407	94.62
*M462623	94.62
*M56410	94.62
*M93419	97.74
*M463406	98.14
*M176778	99.87
*M101577	100.92
*M106293	100.92
*M171337	100.92
*M192611	100.92
*M205307	100.92
*M206218	100.92
*M232218	100.92
*M232633	100.92
*M244096	100.92
*M272240	100.92
*M287981	100.92
*M332463	100.92
*M340489	100.92
*M362212	100.92
*M369386	100.92
*M423056	100.92
*M426294	100.92
*M430883	100.92
*M501772	100.92
*M52133	100.92
*M534888	100.92
*M535256	100.92
*M556599	100.92
*M578322	100.92
*M65358	100.92
*M75468	100.92
*M87467	100.92
*M95124	100.92
*M160798	100.92
*M444092	100.99
*M304703	101.37
*M51297	101.37
*M161616	101.38
*M204329	101.38
*M227306	101.38
*M340501	101.38
*M113260	102.5
*M323456	102.5
*M324713	102.5
*M447633	102.5
*M67318	102.5
*M88718	102.5
*M373580	102.72
*M409432	102.98
*M119969	103.67
*M265247	103.68
*M86819	104
*M427788	104.7
*M200648	106.81
*M123734	107.83
*M129774	107.83
*M140649	107.83
*M249936	107.83
*M348069	107.83
*M58545	107.83
*M68485	108.16
*M113200	109.87
*M134227	109.87
*M195949	109.87
*M246736	109.87
*M356054	109.87
*M389377	109.87
*M488956	109.87
*M620596	109.87
*M80062	109.87
*M90238	109.87
*M375837	113.7
*M398081	113.7
*M51869	113.7
*M181207	117.39
*M236574	117.39
*M51013	117.39
*M355530	117.85
*M124413	120.54
*M126379	120.54
*M130875	120.54
*M140886	120.54
*M142895	120.54
*M172843	120.54
*M184527	120.54
*M186501	120.54
*M204618	120.54
*M209848	120.54
*M213180	120.54
*M233984	120.54
*M237204	120.54
*M333937	120.54
*M350507	120.54
*M372976	120.54
*M380835	120.54
*M381090	120.54
*M417834	120.54
*M428496	120.54
*M478279	120.54
*M493193	120.54
*M501692	120.54
*M561645	120.54
*M572611	120.54
*M57341	120.54
*M578606	120.54
*M286987	122.87
*M257121	123.23
*M555494	123.6
*M416488	124
*M469589	124.02
*M125473	124.34
*M179826	124.34
*M237983	124.34
*M286986	124.34
*M468414	124.34
*M197312	124.98
*M141873	125.45
*M144708	125.45
*M256470	125.45
*M437087	125.45
*M326511	126.36
*M140948	126.37
*M188217	126.37
*M287456	126.37
*M296835	126.37
*M436528	126.37
*M518097	126.37
*M67949	126.37
*M296815	126.37
*M362073	126.38
*M65824	126.38
*Cr4	126.8
*M553251	126.86
*M290363	126.88
*M290818	126.88
*M563250	126.88
*M191596	126.9
*M628192	126.9
*M176967	127
*M354685	127
*M470688	127
*M362068	127.53
*M128836	127.66
*M366503	127.95
*M107419	127.99
*M122895	127.99
*M126558	127.99
*M214540	127.99
*M236700	127.99
*M240230	127.99
*M269013	127.99
*M341244	127.99
*M362062	127.99
*M475801	127.99
*M496292	127.99
*M141475	127.99
*M204077	127.99
*M304083	127.99
*M445775	127.99
*M264354	128.55
*M279571	128.55
*M453156	128.55
*M71136	128.55
*M259257	131.11
*M416463	131.95
*M429449	132.77
*M203305	134.16
*M489282	134.16
*M510836	135.27
*M464485	136.38
*M265032	137.49
*M433475	137.49
*M555714	137.49
*M588716	137.52
*M131527	140.94
*M183458	140.94
*M214260	140.94
*M337227	140.94
*M616025	140.94
*M173185	141.52
*M180350	141.96
*M241738	141.96
*M310042	141.96
*M364698	141.96
*M442643	141.96
*M99904	141.96
*M118650	142.53
*M297341	142.98
*M389288	142.98
*M475379	142.98
*M186827	144.14
*M447240	144.14
*M362785	145.08
*M100844	148.05
*M180411	148.05
*M277890	148.05
*M307804	148.05
*M466984	148.05
*M102581	149.17
*M155331	151.41
*M268617	151.41
*M273242	151.41
*M366139	151.41
*M393754	151.41
*M456893	151.41
*M438219	151.41
*M88650	152.52
*M105181	153.64
*M158392	153.64
*M216920	153.64
*M227333	153.64
*M244949	153.64
*M313747	153.64
*M333968	153.64
*M334019	153.64
*M345561	153.64
*M414138	153.64
*M482597	153.64
*M572267	153.98
*M550652	154.44
*M382214	154.66
*M108249	156.48
*M143397	156.48
*M168989	156.48
*M173845	156.48
*M181209	156.48
*M270531	156.48
*M272599	156.48
*M274597	156.48
*M362778	156.48
*M369177	156.48
*M377108	156.48
*M385000	156.48
*M393065	156.48
*M410333	156.48
*M477516	156.48
*M483914	156.48
*M650383	156.48
*M68328	156.48
*M78035	156.48
*M93130	156.48
*M95400	156.48
*M373924	158.53
*M188336	160.68
*M190410	160.68
*M211943	160.68
*M211949	160.68
*M215578	160.68
*M219112	160.68
*M262843	160.68
*M282964	160.68
*M309630	160.68
*M331800	160.68
*M369625	160.68
*M399060	160.68
*M407018	160.68
*M425326	160.68
*M449237	160.68
*M468091	160.68
*M559587	160.68
*M595635	160.68
*M68373	160.68
*M285042	161.21
*M416860	161.21
*M456446	161.21
*M509961	161.21
*M88955	161.51
*M200541	165.28
*M286617	165.28
*M420279	165.28
*M434701	165.28
*M402292	168.78
*M456436	168.78
*M170496	169.94
*M551420	170
*M270797	174.6

## Sheet: S3
Table S3: Design of TaqMan assays for SNP genotyping in Alberta limber pine seed families
Assay Name	VIC	FAM	Forward Primer Sequence	Reverse Primer Sequence	VIC - Reporter 1 Sequence	FAM - Reporter 2 Sequence	Context Sequence
M287456-700R	T	C	GGTGCTCTGACTTAGGAGAACTG	TCTTCTAAGTTCGAGCACCCAGATA	CGACGTCAACTTTTTTAGAC	CGACGTCAACTTTTCTAGAC	TGACTTAGGAGAACTGCGAGGTCTA[A/G]AAAAGTTGACGTCGCTGGTGATGTT
M304083-485Y	A	G	GGGCAGGTTAGTTTTGGTGAGAAT	GAGAGGGAACCCCATGTAAAACC	CTTAGCCCTAACAGAAAA	TAGCCCTAGCAGAAAA	GTTAGTTTTGGTGAGAATTTTTCTG[T/C]TAGGGCTAAGGGTTTTACATGGGGT

## Sheet: S4
Table S4: Pinus flexilis SNP sequences for design of Sequenom iPLEX MassARRAY
Gene-ID	CDS-ID	SNP-ID	5'-seq	Site	3'-seq
LPss193890_c0_seq1	M463406	M463406Y	TTCGTCTCCAATTCGATCTATCTWTCTTTCGAAGACAAAATTCAATTTTTTTGGAATGATAGCACACCAGAAAAGAAAACCCTTCAAGTTAATTC	[C/T]	ATCGCTCGCATTACAGGAGGATCTTTAACAACTCAACAGGCACCGTGGAGCCAAACGGCAATCGAAACAAGCAGAAAATTGACAGTTAATAACAGTGGCGCGCCATCCAGGGTGATTCATTATGA
LPss193890_c0_seq1	M463406	M463406R	ATTACAAGGCAGCTTGCTTCCTTTCCAACATGAGAGAGACAGTTAAAAACAAGGGATTACAAGCTATGCAAACCTTGCTTCTTAAGGATCTCTTGCATGTTGATTGGAATGTGAGAAGCCCCAGTGAAGGGAAAGAGCTGCTGCGAAAACGTCTGAACGTGGTTGAGGATATCCTC	[G/A]	TTGCTCTGGATGATGTTGGCCAACATGAGCAATTAGCTGACCTCCTGGACCTGAATGCTTTGCATCCAAACGCTGTAATTCTGGTGACAACTCGAGATAGAGGAGTGCTACAACGATTCAGAGGTTGTTTGGAGTACGAAGTGAAGAGATTGGAGGCCACGGAAGCAGAAAAATT
LPss193394_c0_seq3	M445775	M445775Y	CAAAAGTAGCCTTACCGAAGCTTTGAAATGGTCAAGGGAGGCTGTCATTCATCCTGGCGGCCTCCAATCCCTACGGCGCCTTGCTGCAGATTATTCTCCGAGTTCTGGCGATAAGGGAAGCTATGAGAGCGAGCATGATTTAGCTGCTATGGTGCAAGATTTCATGGAGAATGGAAGCTCTGGGCAAGAWGTCGGTTGTTACAGCAGCGACAGCGATTCCGGCACAACCAACATTTTAAAGCTTGTAGAAAGTAT	[T/C]	TCATTCTGTCCAATAACATCGATTTTCATTGCTCAAGGGAAGGGATTTGCAAGGCTAGTTGTATCAAGAAGTTGTTAGTGAAGCATTTGAGGTCTATTGGATACAACGCTGCAGTTTGCAAGTCAGAGTGGAAGGGAACTGATAAAGTTCCAGGGGGTGAATATGAGTACATAGATGTTATACTG
LPss193340_c2_seq1	M444092	M444092M	CTCCTGCTGGAGTCGGTCCCGCTGGGGTAGAGAAGAAAGTTGCCGAGAAGACATCATTTGACGTCAAGCTGGAGAAATACGATGCCACTGCAAAGATTAAAATTATAAAAGAGGTGAGGAGTTTCACAGATCTAGGGCTCAAAGAGGCCAAAGATTTGGTAGAAAAGGCTCCTGCTATTTTGAAGAAAGGACTGACGAAAGAGGAGGCTACCCAGATGATCGAAAAGTTGA	[A/C]	GGCGTTAGGAGCTACYGCAGTGATGGAATGAGAGAGTAATTGTCCAGGAATTTGTTTTTGTTGCTGGACAAATAATATGGGAATTTATTGAGGGAATGTTGTTGAATTTACTGAGTAGATTAGGGTTGTCTTTCGTGCCAGGGACCTGGATGAATCAGCCTTATTTTATAATAATTCCAGAGGATACGATTCTGTTTTACACAAGATT
LPss193207_c1_seq1	M438219	M438219M	TTCTTTGCCATCTCCCTCTGCTGGAAATGGACATAAGTCAAAGGATAAAGCAAAAATTAGAGTTTTCAGAAGAACTCGTTCTATGAAGGCTGTTGTAGAGGAAGCCAAGGGGATTCTGGAAACTCCCTTAGACATGGAGAAGAATGAGTCCGAAGATGGACAAGAACAAGAACAAAATGATGCTGAAGTTACAGCAAATAGTGAGGACCTAGGGAAAGAGTC	[C/A]	GATAAGGATAAAAGTGATACTGCTAAGGAAATTGACGAAAGCAAAGGGGAATCACTTGCCAGCGATAAAAAACCTTCTCAGTCTGGAAAGAAGAGGCGGCGCAAGTATTCATCTAGAGCCACAAGTGCTCAAGATGCAGATGATGCTGATGTTCAGTCTGAGCTCA
LPss190313_c0_seq1	M355530	M355530R	ATTAATTGCTTTGACATGGGCTCTGGAACCCTCGCTTGTGCAGCAAAAGAGGGGATGAAACTTTATGTTTATAATCTAAGAGCAGCACATGTAGAAAGCACAAGGCATAAGGCTATTGAAAATGCCTTGAATGAAGCCCTATCTGGGGGCCTAAGTGTCAGTGCTGCCACAAAGCAAGC	[A/G]	CAGAAGGAAGGAGCTAAAGCAGCAAAGTTAGCTTCCAGGCAAGCAAAGCGGATTATTGGACCCATSTTGTCGTCAGGATGGGACTTCTTCGAAGCTTTGTACTATGGTGGTAGCATTATTGAGGGG
LPss187930_c0_seq1	M304083	M304083Y	TTAGCGGATTATTCTGCTCATCCTCGACATGTCAATGTAGTGAAAGAGTTTGTTCAACCCCTTACAGATGACTTACTTGCTCTGGACTGGGAGGCTGACCTTGGTGAGCCTATGCTGCCATCTTATGGGGCCATTAGGATTGCAGTGCTTAAGCCAAAGGAGGGTCTTGCCGATCCACAGAGGTTTGAGCTGGCTGAGATCCTCAGTGGGTACAAGGGTTTTTTTCCATCAGTTGGGCAGGTTAGTTTTGGTGAG	[C/T]	TAGGGCTAAGGGTTTTACATGGGGTTCCCTCTCACTTTTCCCCGGTGGTAAAGAGCTGGAGGAACTTAACGCAAATGAGGAGCATGCCAAGATACAGAATGAGAAGGTTCTGCCCCAGATGGAGAATT
LPss187549_c0_seq6	M296815	M296815Y	GTAGATGTACTGAACTACATCTTATCTACATATGCCACACATGGATTAGACATCAATAGTGGCTGTGGTTCAGACAACAGCACAGCCCTGCATTGTGCTGCTGCAGGAGGGTCTGGCCGTGTTGTTGAAACTGTCAAGTTGCTGATTCAGTCAGGTGCAGATGTTAATAGCTTGGATGTTTTTGGAAGGAGGCCTGC	[C/T]	GACGTGATCATTGTTCCTCCTAAATTAGTTCATGCTAGGTCTATTCTAGAAGAAATGCTGAATGTGGCTGTTGGTGCACTGTTAAATTCTTCAWCAAAGTTTTCCAGCATTATGTCAGATTCTAGCTTCCATTTACCTGAATTYGTACATGA
LPss187019_c0_seq1	M286987	M286987Y	ATTCCGCCCTCGCACAGGGCGCTCACGGCCTCGGTCACATGGGGTTCCAGATTTAGGTACGCCGTGGCGCCCTTGGCAAGCTCTCGGGCGCTCTCCACTGCCTGTATCTCGGCGCTTTTGCTACCATGGGCGTATAAATATCCTTCGCCCACTACCTTTGCGCCCTGCGCGATCACGCATCCGAAGTTAGGGTGTGGAGCAGTTAAGCCCCCTGATCTGTCTGCAATTTTCGCAGCTCTAAGCAAGTGGTCGGCG	[T/C]	CAGGGGCCGAAAGGAAGCTCGAATTGAAAAAGCCATAGAGCTCTAAACAATTCGAAACCAGATTGACGTGTCCCTCTTTATATAGACTGAACTATTCAAAATAGACTTAAACCACG
LPss185286_c0_seq1	M259257	M259257Y	TTGCAGAGAAAGGCTTCCCCATCTCGGTCTACAACAGGAGCAGTGAAAAAGTGGATGAGACTGTTAAGAGAGCCAAGATTGAAGGCAATCTGCCTGTGAAGGGCTTCCATGACCCAAAGGATTTCGTGAATTCAATCCAGAAGCCCAGAGTTATAATCCTGCTCGTCAAAGCAGGGTCCCCAGTGGACAAAACAATAGAAACCCTATCCGCC	[T/C]	ACATGGAGGAAGGGGATTGCATTGCGGATGGTGGGAATGAATGGTATGAAAACACAGAGAGGAGACAGGAGGCTGCCAAGCAGAAAGGGCTGCTGTATTTGGGGATGGGAGTCTCTGGCGGTGAGGAAGGAGCCAGGCATGGTCCCTCTCTGATGCCCGGAGGGTCATATGAAGCCTACAAGTACATCGAGGACATA
LPss185286_c0_seq1	M259257	M259257S	AAGGGCACTGGTAAGTGGACTGTGCAACAAGCCGCAGATCTGTCCGTTGCAGCCCCTACCATTGCTTCTTCTTTGGATTCTAGGTTTCTTAGTGGATTGAAAGAGGAGAGGATGGAGGCCTCCAAGGTGTTCAAGAATGTAGATGTGGGTACTGTGCCAGATTTGGACAAGACTACGCTTATTGATGATGTGAGGCGGGCTCTGTATGCATCTAAGATATGTAGTTATGCGCAAGGAATGAATCTGATCCGTGCG	[C/G]	ATCTGGAAGGGTGGTTGCATCATTCGTGCAATATTCCTCGATCGGATCAAGAAGGCCTATGACAGGAATCCAGATCTGGCTAGTCTGCTGGTCGATCCTGAATTTGCAAAGGAAATGGTTGAGAGACAGTCAGCGTGGCGGCGAGTTGTGACTC
LPss180917_c0_seq1	M204077	M204077R1	ATGGCACCACCTGGGGTTCCTGCAGAGTTGTTCGGAGAGTCGAAGGTGGGTGCCCTAACTGGAGGGTATAACTCCAAGAGAGGGTATGTTACCTTCCTGGCGGGTAGTGGAGATTACTGGAAGGGCGTTGTAGGGCTGGCTAAAGGCCTTCGCAAGGCCAATAGCGCCTACCCTCTCGTTGTTGCCATGTTGCCTGATGTTCCGGAGGAGCACAGGGAGATTTTGAGGC	[G/A]	CCAAGGATGTATATGTCGCGAGATCGAACCTATCTACCCTCCTGAAAATCAAGTGCAGTTCGCCATGGCTTACTATGTCATAAATTACTCTAAGCTACGTATGTGGGAGAAGTTTGAGGATTACAGCAAGATGGTGTACCTGGATGCAGACATCCAAGTGTTTGAGAACATCGACAATCTCTTCGACATGCCGGATGGCTACTT
LPss177965_c0_seq1	M176778	M176778K	CCTTGGATTCCTCCAAGGCAGGTTTTATATAATGGCTATAGATTGCTCTCCAGTTTCAATACAGATGTGCACAATCTTCTTCTCA	[T/G]	TGAAGTGATTGTAGACATTGATTCTGAAATCTGTGGAGGTAAAACCATGGCTTCTTCCATGACCATATCAAGGTCTAGGCTCTGTATCTTATTAGTTATACTGGAAAGAGTATTCAGCGCCTGTGATGACTGCGTGAGTTCCAGAGCATCATACTATGGAAGTCCAGACAGCCTCGGAAATGATAGTGGAGCTTGCGGCTAT
LPss175832_c0_seq1	M160798	M160798Y2	CCAAAGGAACATGCTTCTCGCCAAACATCTCAAGCTCTACAGGGCAGTACTCTGAAAAATATATCTTCCGGAATGAATGCTTCAAATCCTCCCCTCCCAACAGTTAATGGAACTGGAGCTTTTGGGATTCCATCATCTAAGGTTATTTACAGGTCTCTTTTGGCTGATGTGGTCCAGACAGACACTGTTAAAGGTCTCTGCCAACTTCTTGTCATTGCTTCCAGAGAAGCTGCAAATGCTTGTGGAGCTCAAACA	[T/C]	CTCTTTACAGCTCCGTCTTCACCCTCTGGTGGTTGTAGGAAGCCTTGCAGTCATCATACAACACAAACATTTGCTGAACAAGAGAGAATTATCCTGTCAGAATTTCGTGACTGTCTTCGGAGTATTATTGATGTAGGCAAAAGAAGAGCCACACAGTATTCAACAGAGGCAGCAATGACAATGAAAAGGAACCAGCAGCCTGAATTAAATCCTCAGCTTAGCAGGCCTGT
LPss172680_c0_seq1	M141475	M141475Y2	ATGCAAAGACTTTGAACCTTGAGATGGAGGTCAATGTCATTGCACAACCCCTAGATTCCCTCACCAGGGAAGCCCTAGGGATCAGAGAAGACGAGGCATTAGCTATCTGTGCACAATTTCGTCTTCATCAACTCTTAGGGGAGGGCTTGAACAAAAATGAAGGCAAAAACAATCAGTTAACATCAGTTCCCCCTCGTGACAAGTTCATCAAATTCATAAAGGACCTAAATCCCCTGGTGTTTTTCTTGAGTGATA	[T/C]	ATAGATCATCTATGGAGATTATTGGATTCAACCAGCGTATGTTTCAAGGGGAGAGAGTGCGAGGAAAGGCGTATGGTTGAAGGCGAGGCTGCCATGGGGTTGGTTAATAATGTAGCGTATGATGGTGCTTCTCGTGTGGAGAGAAACGAGAGCCATTTGAACTGGGCCAATAGAATTAGGGAAGGGGGATTTGTCTGTGAAATCCCTAGTGACAAAATAATTGACTGTGCAAGAGCCATGCTTCGTAAACATGAT
LPss172680_c0_seq1	M141475	M141475Y1	ATGATGTGGAGGATTCTACCGAGATAACCAAAAAGAGAAAAAGAGCTAGAGTCTCAGGTGAATCTACCAAAAGCAAACTCTGGAATGTCTTTGAAAATAATGCAGCCTCACCCCACACAGGAGAGAGCTTGGATCATGGAAACCACTGCCTGGCCCAAGAAACTAAGTTAAGTTCTCTGCATGGAGCGGAATCAGACAATCAATTAGATTTGGAGGCCATGGGAAACAACAGCAACAATAACAACAATAACAGTA	[C/T]	AGATCAGGTGGACGCCAGAGTAGTCCACCTAATCTTCCCAAGGAATCGAGATGGGCTGAACAACTGCTAAACCCGTGTGCAGTAGCTATAGCCAACAATAACATTGTTCGCATTCAACATCTCATATGGGTCCTCCATGACCTTGCATCAATCACAGGT
LPss167582_c0_seq1	M118650	M118650W	AGACCAGACAATCCTTGGGAATTGGGGAGTTGGATCCACCTCCATGGCTTAATAGAATGCGTGAAATTGGTTACCCTCCTGGGTACCTTGACTCGGATGGGCCAGATGAGCCTTCGGGAATTATAATCTATAGGGATGATGAAAATATGGAACTGGAGGAAGAGGGAGAGATCGTTGGGGATGAACCCTCAAAGTTATCAACGAAAAAGATGACTGTGCCCTTTCCTGGAATAAATGCCCCCATACCTGAAAATG	[A/T]	TTGAACAAACGCCAGGTTCATCAACTTCAGTGACAAGAGGGCACCGCTTTGATCAAACTAGGGCCTGGGACTACAACAGTTCACCAGACGAACAACCTCCAGGAACTGAACGTCTCGGAAATAATGCTTTCGGTTCTGATTACGCATCAAGAAGCATAGGAGGGAATAACACTCCGAGTCCAAATTACTCAAGTCGACACCACTTACCCCGAAGCCCTAATCTGACCAGGTCTGTATCTGACAGTGGACGGAGAA
LPss179333_c0_seq1	M187937	M187937Y	ATGACCCGCAAGAAACCCTTATTCTCCCACACCAGGAGGCCAGAAACAATGTGCTCTCGCAAGCGCACTCTGTTGAAGGTTATAGTTCT	[T/C]	GGTGACAGCGGGGTTGGGAAGACATCTTTGATGAATCGATATGTACAGAACAGATTCAGTGATCAATATAAGGCAACTATTGGGGCCGACTTTATGACTAAAGAAGTTGCGGTCGATGACAGAACTGTAACATTGCAGATATGGGATACAGCAGGACAAGAGCGATTCCGGAGTCTAGGAGTGGCGTTCTACAGAGGA
LPss187043_c0_seq2	M287456	M287456-634R	GATCTTGGAGAGTTGTCGAGTGTTGAACGCTTGAGGTCGCTGGAGAAGTTAAATGCATCTGGCTGTGGGAAGTTAAAGAGTATCCGGTTGTCC	[A/G]	ATCAGCGGAATCTTCGAGACCTAGATGTTTCTGGGTGCTCTGACTTAGGAGAACTGCGAGGTCTAAAAAAGTTGACGTCGCTGGTG
LPss187043_c0_seq2	M287456	M287456-700R	GGCTGTGGGAAGTTAAAGAGTATCCGGTTGTCCAATCAGCGGAATCTTCGAGACCTAGATGTTTCTGGGTGCTCTGACTTAGGAGAACTGCGAGGTCTA	[A/G]	AAAAGTTGACGTCGCTGGTGATGTTGAATATATCTGGGTGCTCGAACTTAGAAGAGCTGCTAGGTCTTGGAAGTTTGAGT
LPss190571_c1_seq5	M362778	M362778R	CTGCAATGGTGGCGCGCAAACTTTCTGTTAGGGACGTCTTCCTCATCCTGCTTTTTATTGCAGGGATCGGATTGGCGCTATCGACTGTGTTGCATAAGGATACAAATGCTTACAGCCCCTTCTTTCCTCGTTCAGTTTCTCACAC	[G/A]	CTCACTAATTTCATTCCACACACACTTACTCGTGACTCAGAGTCTTCCATGGGATCTGCTAAAAAAATGACTCTGATTTTAATGGCGCCTGCCCTAGCTCCTGTTCCY
LPss190571_c1_seq5	M362778	M362778Y	CTCACTAATTTCATTCCACACACACTTACTCGTGACTCAGAGTCTTCCATGGGATCTGCTAAAAAAATGACTCTGATTTTAATGGCGCCTGCCCTAGCTCCTGTTCC	[T/C]	CCCCCTCCCCCTCAAGATGAATTAGATTTGGTTTTGGCAAAAACTGCGAACCCAAACAGGACGGTAATAGTCACTGCCTTGAATGGGGCTTGGGCTGAGCCGAACACCATGATTGATCTCTTCCTTGAGAGCTTCCGTGTGGGTGAAGGGACACAGGATTTGCTGAACAATCTA
LPss193394_c0_seq3	M445775	M445775W	TTGAAATGGTCAAGGGAGGCTGTCATTCATCCTGGCGGCCTCCAATCCCTACGGCGCCTTGCTGCAGATTATTCTCCGAGTTCTGGCGATAAGGGAAGCTATGAGAGCGAGCATGATTTAGCTGCTATGGTGCAAGATTTCATGGAGAATGGAAGCTCTGGGCAAGA	[T/A]	GTCGGTTGTTACAGCAGCGACAGCGATTCCGGCACAACCAACATTTTAAAGCTTGTAGAAAGTATTAAGGGCCTGAAGACTTCGGTGATGCCATTCGAGAAGGATTTGCTCTCTCTGATACAAGCT
LPss189029_c0_seq1	M326511	M326511R	ATATGATTCATGGCAGATTAAGAACAGTGTGGCACCAGGTGTAGCAGACCCTCATGGTCTTTGGCACAACTGCAAGCTAGATATAAAGAAATGTAGTTCAAGCCAGTTGGAAACAATGCAAGGTTTCAGGATTGAAATGCTTAACGCATTGAAGGTATTTCAGAGCTCTGCATCAGGAGGCATGTTCATCAACTCATGCTATGCACATTGTCAATCTGAAATGCAGGAGACTTGGCTTGAAGATGACTCTCCAAG	[G/A]	TTAAGGAAACTGACTGTCCATACCCATGTGATTCCACTTGTCACAACCGTRTTTTCACACCGAAAGAATACTGA
LPss155897_c0_seq1	M86819	M86819R	CTGGAGTGAACTCCCGTCTTCTGCTCGCCAGGAACTGTTACGTATTGATAAACAATCTCTGTTCGAACAAGTACGTAAAAATCTTTATTGCTCACGCTGCAATGGTTTGCTACTGGAAGTATTTTCCCAGATTGTCCATTATGGGAAAAGC	[A/G]	TACAACAGGAAGCTGCATATGCAAACATTGGGGGTGGCCCTGGACAATATAGAAATCATAATGAAAATGGATCGAAGCTAACGATTGCAATTTCTCAAGATGATACAAGTGATCCATCAGTTCACCCATGGGGTGGGTTAACTACAACTCGAGATGGTGTCTT
LPss169068_c0_seq1	M124413	M124413Y	CAACGAGCTGATTGAGTGTATAGAACACATCTTGTACATTATCTAAATGGATTGGGTGGATGTGAGCATCGGAAGCAGAAAATGGCAACTGCAGAGATTGATGCAACTCCTACTCGCAG	[C/T]	TCCACGAAAGCTCTCCTACCGACTGCGATTCCTCGTTTACCCATCATTCCAAAGATTAAAATACCTAGAGTTTCCCAACAAAGAGCTGCTCAAGGATGCCAAGACCTTCAAAAATTGTTCGGCTCTGCGATGGTTGAATGCGTTCAAACCATTGAAAGAACGTTCAAGGCCGTAGT
LPss192488_c0_seq5	M416463	M416463K	GGTAGCTTTATCTGCACGTTGTCTCCTTATTTTTCGTTGGGATTAACTAATCAGTTGCAGCAGGAATGAATACAGTCTTATCGTTTGGATTAATTAACCAGTGGCGTCCGGAATGGATTACAAGCTTACTGTTGAAAGGTTTGTATGTATAAT	[G/T]	CTTGCTGCATTACTGTCTGCTGATCATCAATTTGTGTTGGGTGAGTTTGACTATAAAGATGCTCTGCAAAAATCAATTCTGTTTCTGGAGGCTCAACGTTCAGGGAAACTGTCCAGCGGTAGCAACAGGATCTGGTGGAGAGGAGATTCTGCTCTCACAGATGGACAAATGGAAAATGTGGATTTAGTTGGTGGTTACTACGATGCTGGGGATAATGTGAAGTATGGCCTTCCCATGGCATTCACCGTTACAATG

## Sheet: S5
Table S5: Identification of SNP loci in significant association with major gene resistance to Cronartium ribicola in the Alberta limber pine seed families.
Trait	Marker ID (a)	LG	Position on LG8 (cM)	Family PB-#2_GLM			All four families_GLM			Family PB-#2-MLM		All four families-MLM
				marker_R2	P	perm_p	marker_R2	P	perm_p	Marker_R2	p	Marker_R2	p
Res	M187937Y	8	18.33	0.09913	0.0012	0.0421
Res	M463406R	8	98.14	0.18081	3.8255e-05	0.00228
Res	M463406Y	8	98.14	0.13312	0.00059663	0.02367
Res	M176778K	8	99.87	0.19077	2.0496e-05	0.00126
Res	M160798Y2	8	100.92	0.12552	0.00107	0.03807
Res	M444092M	8	100.99	0.23383	1.4398e-06	0.00013	0.1209	3.7936e-05	0.00172
Res	M355530M	8	117.85	0.31194	5.2353e-09	1e-05	0.17863	1.607e-07	4e-05
Res	*M124413Y	8	120.54
Res	M286987Y	8	122.87	0.53039	3.8626e-17	1e-05	0.34452	3.9818e-15	1e-05			0.12805	0.0025
Res	*M326511R	8	126.36
Res	M287456-700R	8	126.37	0.73005	1.2257e-37	1e-05	0.46256	8.3239e-26	1e-05	0.12109	0.00051412	0.19592	4.8168e-08
Res	M287456-634R	8	126.37	0.57266	3.4557e-19	1e-05	0.17386	3.0818e-07	5e-05
Res	M296815Y	8	126.37	0.72326	9.2497e-35	1e-05	0.22277	9.662e-11	1e-05	0.151	0.00035665
Res	Putative Cr4	8	126.8	1	0	1e-05	1	0	1e-05	1	1.0257e-21	1	5.9963e-33
Res	M304083Y	8	127.99	0.839	8.8009e-41	1e-05	0.90015	8.8492e-80	1e-05	0.23361	0.00016062	0.64513	1.2213e-12
Res	M445775Y	8	127.99	0.59804	1.0267e-20	1e-05	0.09543	0.00040047	0.01551			0.09985	0.00775
Res	M445775W	8	127.99	0.57778	7.9909e-20	1e-05	0.13886	8.007e-06	0.0004			0.07497	0.02749
Res	M204077R1	8	127.99	0.61667	1.5083e-21	1e-05	0.27359	1.7442e-11	1e-05			0.07111	0.03441
Res	M141475Y1	8	127.99	0.59524	8.8957e-20	1e-05	0.23748	9.8212e-10	1e-05
Res	M141475Y2	8	127.99	0.5036	6.1867e-16	1e-05	0.2891	2.3268e-12	1e-05
Res	M259257Y	8	131.11	0.49767	7.945e-16	1e-05	0.19205	4.8257e-08	3e-05	0.14552	0.00363
Res	M259257S	8	131.11	0.44554	8.6607e-14	1e-05	0.15444	1.6139e-06	0.00012	0.11959	0.00946
Res	M118650W	8	142.53	0.50301	3.2637e-16	1e-05	0.28894	1.685e-12	1e-05			0.1143	0.00363
Res	M438219M	8	151.41	0.38401	3.8363e-11	1e-05	0.13227	1.5628e-05	0.00075
Res	M362778Y	8	156.48	0.52806	2.3344e-17	1e-05	0.22546	1.5106e-09	1e-05
Res	M362778R	8	156.48	0.54967	3.1874e-18	1e-05	0.2254	1.9607e-09	1e-05
Note: SNPs M124413Y and M326511R were included as they were co-segregared with phenpotypes in the famiy #6665.

## Sheet: S6
Tabe S6: Annotation of limber pine polymorphic genes associated with major gene resistance to Cronartium ribicola in Alberta limber pine seed families.
*CDS-ID	Linkage Group	POSITION	Transcript-ID	Lowest E-value	Accession (E-value)	Greatest hit length	Greatest bit score	Short_description
*M187937	8	18.33	LPss179333_c0_seq1_m.187937	7.41e-99	AT1G52280.1	206	290.426	RAB GTPase homolog G3D
*M463406	8	98.14	LPss193890_c0_seq1_m.463406	1.98e-44	AT1G27170.1	450	171.014	disease resistance protein (NBS-LRR class)
*M176778	8	99.87	LPss177965_c0_seq1_m.176778	1.27e-67	AT4G17030.1	244	214.927	expansin-like B1
*M160798	8	100.92	LPss175832_c0_seq1_m.160798	1.34e-121	AT4G29000.1	439	375.941	Tesmin/TSO1-like CXC domain-containing protein
*M444092	8	100.99	LPss193340_c2_seq1_m.444092	8.7e-43	AT4G37660.1	153	144.05	Ribosomal protein L12/ ATP-dependent Clp protease adaptor protein ClpS family protein
*M355530	8	117.85	LPss190313_c0_seq1_m.355530	2.33e-83	AT1G56423.1	200	253.447	unknown protein
*M124413	8	120.54	LPss169068_c0_seq1_m.124413	4.34e-51	AT5G21920.1	177	170.629	YGGT family protein
*M286987	8	122.87	LPss187019_c0_seq1_m.286987	1e-150	AT3G47390.1	394	455	cytidine/deoxycytidylate deaminase family protein (DCTD)
*M326511	8	126.36	LPss189029_c0_seq1_m.326511	5.59e-176	AT4G19420.1	385	501.13	Pectin acetylesterase (PAE) family protein
*M287456	8	126.37	LPss187043_c0_seq2_m.287456	5.3e-26	AT1G69550.1	325	109.768	disease resistance protein (NBS-LRR class)
*M296815	8	126.37	LPss187549_c0_seq6_m.296815	6.17e-168	AT2G41900.1	697	506.523	CCCH-type zinc finger protein with ARM repeat domain
Putative Cr4	8	126.8
*M141475	8	127.99	LPss172680_c0_seq1_m.141475	8.8e-87	AT3G13840.1	423	282.722	GRAS family transcription factor
*M204077	8	127.99	LPss180917_c0_seq1_m.204077	2.64e-178	AT2G47180.1	324	502.671	galactinol synthase 1
*M304083	8	127.99	LPss187930_c0_seq1_m.304083	5.07e-30	AT2G31670.1	195	114.005	Stress responsive alpha-beta barrel domain protein (SRBP)
*M445775	8	127.99	LPss193394_c0_seq3_m.445775	2.21347e-60	AT2G36560.1	273	199.134	hypothetical protein AXX17
*M259257	8	131.11	LPss185286_c0_seq1_m.259257	0	AT3G02360.1	487	826.239	6-phosphogluconate dehydrogenase family protein (6PGDH)
*M118650	8	142.53	LPss167582_c0_seq1 _m.118650	4.54209e-76	AT5G38600.1	379	254.603	Proline-rich spliceosome-associated (PSP) family protein / zinc knuckle (CCHC-type) family protein
*M438219	8	151.41	LPss193207_c1_seq1_m.438219	1.11e-135	AT1G67230.1	1063	447.203	little nuclei1 (LINC1)
*M362778	8	156.48	LPss190571_c1_seq5_m.362778	7.05e-29	AT1G14590.1	88	112.079	Nucleotide-diphospho-sugar transferase family protein

## Sheet: S7
Table S7: The gene-gene interactions for limber pine major gene resistance identified by GMDR analysis
Model	Training Bal. Acc	Testing Bal.Acc	Sig Test (p	CV consistency
SRBP	0.9769	0.9767	10 (0.0010)	10/10
6PGDH, SRBP	0.9802	0.9717	10 (0.0010)	9/10
NBS-LRR, DCTD, SRBP	0.9915	0.9683	10 (0.0010)	7/10
